# Supplementary material
Source: PubMed Central journal article supplement (PMC4807499)
Supplement: IAI.01389-15_zii999091633so1.pdf [file IAI.01389-15_zii999091633so1.pdf]

## Supplemental Figure 1.

### Effect of Uricase and DNase I on Survival of EPEC Bacteria in vitro

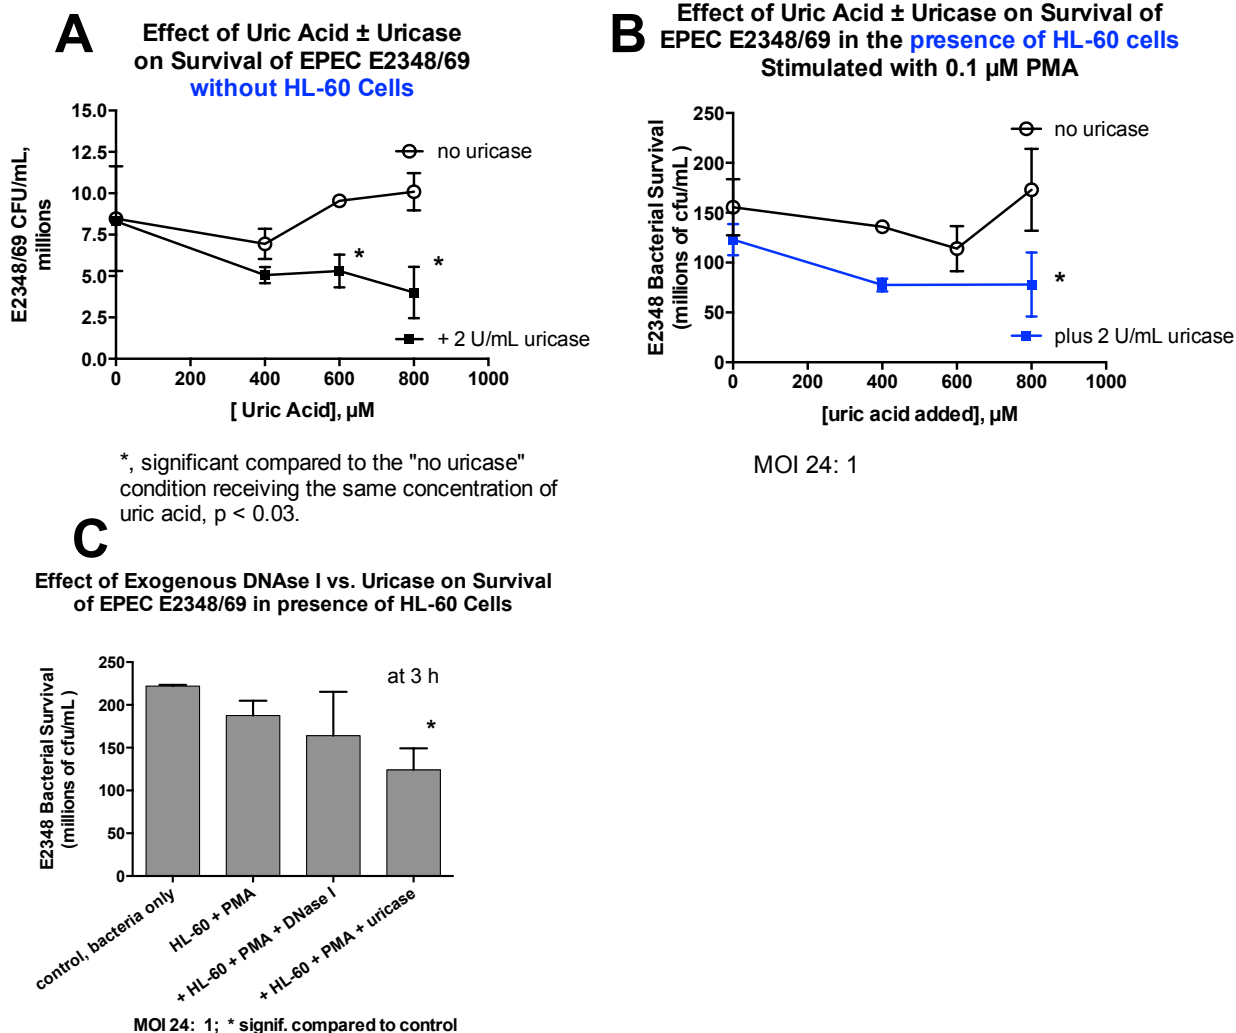

#### Legend to Supplemental Figure 1.

Effect of Uricase on Survival of EPEC Bacteria in vitro and in the Presence of HL-60 Cells. EPEC E2348/69 were subcultured 1:50 into antibiotic-free DMEM medium in the presence of increasing concentrations of uric acid in the absence and presence of uricase, 2 U/mL. Bacterial survival was measured by dilutions and plate counts on LB agar plates. Panel A, effect of uric acid ± uricase on survival of E2348/69 without any HL-60 cells. Panel B, effect of uric acid ± uricase on survival of E2348/69 in the presence of HL-60 cells induced to differentiate into neutrophil-like phenotype for 48 hours. The HL-60 cells were then also stimulated with 0.1 μM PMA at the time bacteria were added. \*, significant compared to the no-uricase condition with the same amount of uric acid. Panel C, comparison of effects of exogenous DNase I and uricase on survival of EPEC bacteria in the presence of the differentiated HL-60 cells. \*, significant compared to the bacteria-only control. Panels A- C were all done using a 3 h assay.
